# Supplementary material
Source: MDPI journal article supplement (https://www.mdpi.com/2571-9408/6/2/105)
Supplement: s1 [file s1]

Table S1

|               | SiO <sub>2</sub> | Na <sub>2</sub> O | K <sub>2</sub> O | MgO | CaO  | Al <sub>2</sub> O <sub>3</sub> | FeO | P <sub>2</sub> O <sub>5</sub> | TiO <sub>2</sub> | MnO | CoO | NiO | CuO | ZnO | As <sub>2</sub> O <sub>3</sub> | SrO | BaO  | ZrO <sub>2</sub> | PbO  | Sb <sub>2</sub> O <sub>3</sub> | SnO <sub>2</sub> | SO <sub>3</sub> |
|---------------|------------------|-------------------|------------------|-----|------|--------------------------------|-----|-------------------------------|------------------|-----|-----|-----|-----|-----|--------------------------------|-----|------|------------------|------|--------------------------------|------------------|-----------------|
| ESFS 76-C-150 | 55.5             | 9.5               | 1.5              | 6.8 | 22.0 | 4.3                            | 0.3 | -                             | -                | -   | 0.1 | -   | -   | 0.1 | -                              | -   | -    | 0.2              | -    | -                              | -                | -               |
| ESFS 76-C-151 | 56.0             | 4.8               | 7.3              | 3.1 | 19.1 | 3.9                            | 0.3 | 4.0                           | 0.2              | 0.5 | -   | -   | 0.1 | -   | 0.1                            | -   | -    | -                | 0.8  | -                              | -                | -               |
| Corning A     | 66.6             | 14.3              | 2.9              | 2.7 | 5.0  | 1.0                            | 1.1 | 0.1                           | 0.8              | 1.0 | 0.2 | 0.0 | 1.2 | 0.0 | -                              | 0.1 | 0.6  | 0.0              | 0.1  | 1.8                            | -                | 0.2             |
| Corning B     | 61.6             | 17.0              | 1.0              | 1.0 | 8.6  | 4.4                            | 0.3 | 0.8                           | 0.1              | 0.3 | 0.0 | 0.1 | 2.7 | 0.2 | -                              | 0.0 | 0.1  | 0.0              | 0.6  | 0.5                            | 0.0              | 0.5             |
| Corning C     | 34.9             | 1.1               | 2.8              | 2.8 | 5.1  | 0.9                            | 0.3 | 0.1                           | 0.8              | 0.8 | 0.2 | 0.0 | 1.1 | 0.1 | -                              | 0.3 | 11.4 | 0.0              | 36.7 | 0.0                            | 0.2              | 0.2             |
| BGIRA 3       | 58.0             | 7.5               | 5.4              | 2.1 | 5.8  | 1.6                            | 3.0 | -                             | -                | -   | -   | -   | 3.0 | -   | -                              | -   | -    | -                | 9.8  | -                              | 3.1              | 0.2             |
| BGIRA 4       | 42.0             | 5.0               | 3.9              | 1.5 | 4.1  | 3.6                            | 3.0 | -                             | -                | -   | -   | -   | 3.3 | -   | -                              | -   | -    | -                | 30.4 | -                              | 3.0              | 0.3             |
| DLH 1         | 25.0             | 1.0               | 1.0              | 0.3 | 1.0  | 4.0                            | 1.0 | -                             | -                | -   | -   | -   | -   | -   | -                              | -   | -    | -                | 67.0 | -                              | -                | -               |
| DLH 2         | 40.1             | 7.3               | 2.8              | 0.9 | 2.9  | 4.2                            | 0.9 | -                             | -                | -   | 0.4 | -   | -   | -   | -                              | -   | -    | -                | 36.4 | -                              | 4.1              | -               |
| AR2 Meissen   | 59.9             | 0.5               | 3.3              | 0.1 | 1.2  | 34.6                           | 0.4 | -                             | -                | -   | -   | -   | -   | -   | -                              | -   | -    | -                | -    | -                              | -                | -               |

Composition of XRF standards, weight % oxide

| Element | R <sub>2</sub> | SE    | Observations | Line equation                |
|---------|----------------|-------|--------------|------------------------------|
| Si      | 0.64           | 8.65  | 10           | y = 0.0023x + 24.279         |
| K       | 0.75           | 1.06  | 10           | y = 0.0000468x + 1.1424963   |
| Ca      | 0.97           | 1.34  | 10           | y = 0.0000308x + 1.6901379   |
| Al      | 0.99           | 0.78  | 10           | y = 0.0196x + 0.372          |
| Fe      | 0.85           | 0.43  | 10           | y = 0.00000636x + 0.03230983 |
| P       | 1.00           | 0.06  | 4            | y = 0.0019x + 0.029          |
| Ti      | 0.99           | 0.05  | 4            | y = 0.0000149x - 0.0011534   |
| Mn      | 0.98           | 0.09  | 3            | y = 0.00000496x + 0.06938027 |
| Co      | 0.56           | 0.10  | 5            | y = 0.00000481x + 0.01857784 |
| Ni      | 0.98           | 0.01  | 3            | y = 0.00000239x + 0.00711018 |
| Cu      | 0.63           | 0.86  | 6            | y = 0.00000226x + 0.57874789 |
| Zn      | 0.96           | 0.01  | 10           | y = 0.00000168x + 0.02428989 |
| Sr      | 0.08           | 0.19  | 3            | y = 0.00000210x + 0.08254440 |
| Zr      | 1.00           | 0.008 | 4            | y = 0.00000357x - 0.00727049 |
| Sn      | 0.88           | 0.74  | 5            | y = 0.000417x - 0.273590     |
| Pb      | 0.90           | 8.16  | 8            | y = 0.0000203x - 3.8476295   |

Regression analysis data
