# Supplementary material
Source: MDPI journal article supplement (https://www.mdpi.com/2571-9408/6/2/105)
Supplement: s1 [file s1]

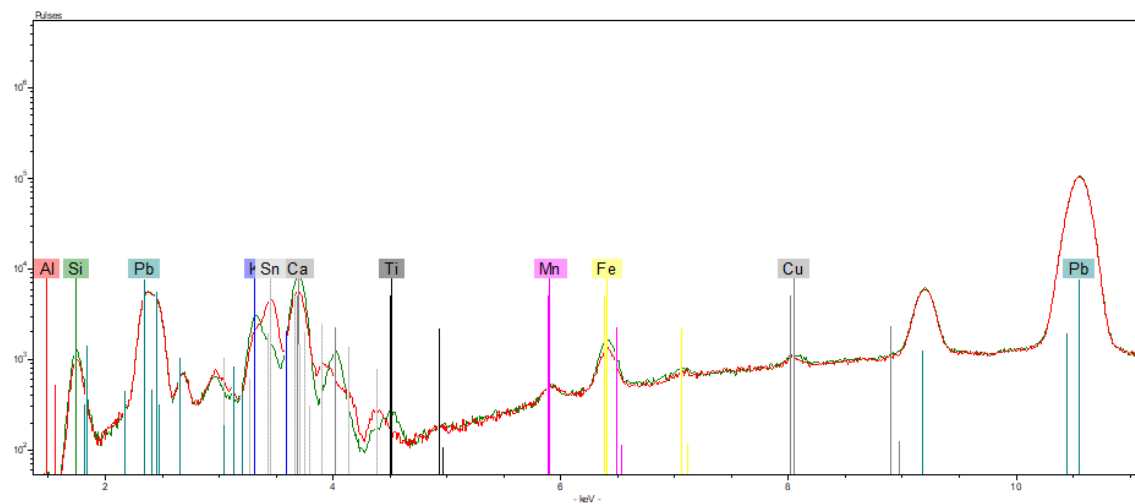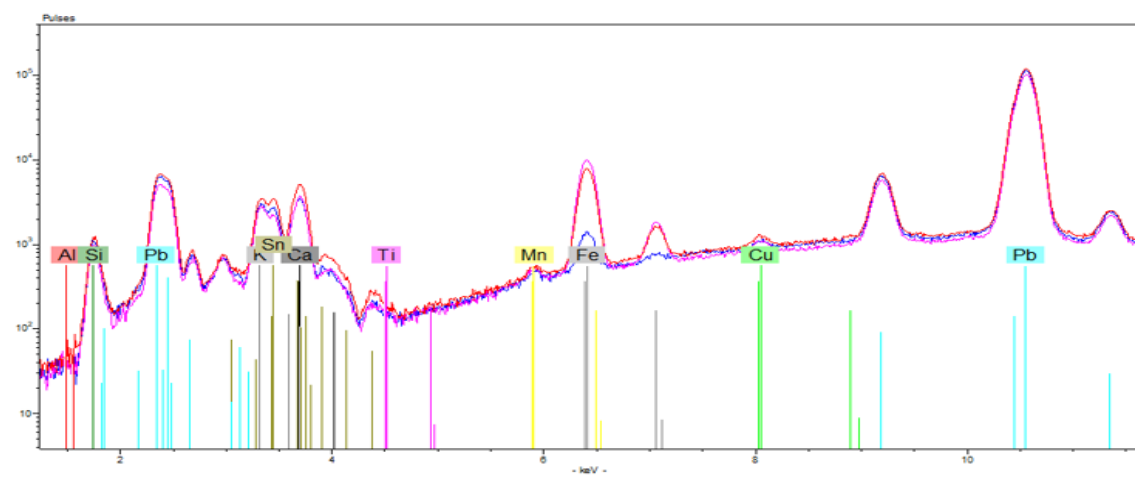

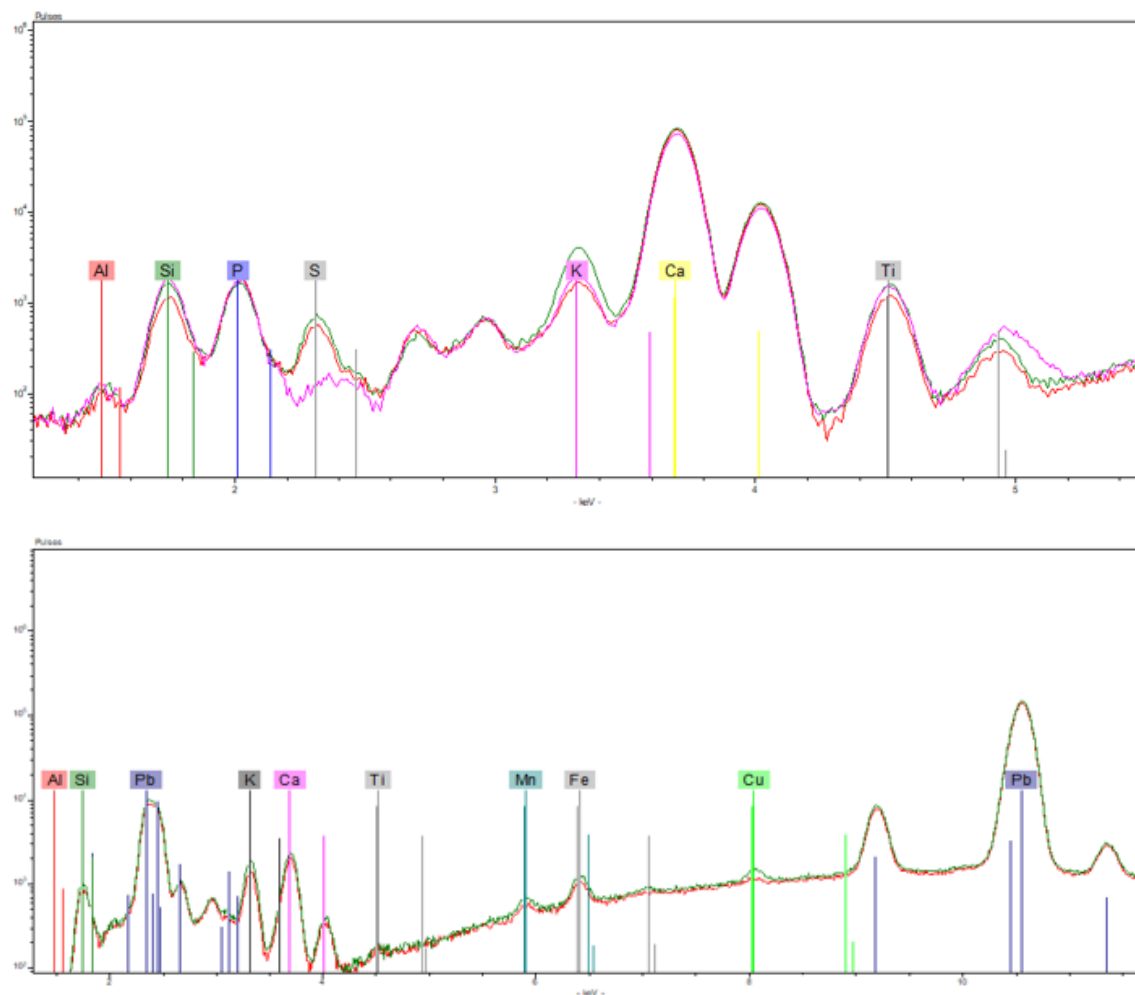

**Figure S1.** Representative spectra from XRF analyses in logarithmic view. Top to bottom: 1) Chelsea bodies WA1965\_8 (red line) and C.37-2019 (green line); 2) Chelsea red/pink enamels (pink and red lines) and underlying glaze (blue line) on Laughing Child WA1965\_8; 3) *Bow bodies: shell salt* (PROV.466-2022; red line), *pickle dish* (PROV.467-2022; green line) and *Tamerlane bust, Timur* (PROV469\_1; pink line); 4) *Bow glazes, shell salt* (PROV466-2022; red line) and *pickle dish* (PROV.467-2022; green line)
